# Supplementary material for: Little Ice Age advance and retreat of Glaciar Jorge Montt, Chilean Patagonia
Source: Copernicus journal article supplement (doi:10.5194/cp-8-403-2012), 2012-03-05
Supplement: Supplementary file 1 [file cp-8-403-2012-supplement.pdf]

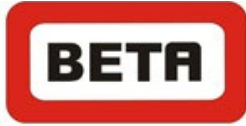

*Consistent Accuracy . . .  
... Delivered On-time*

Beta Analytic Inc.  
4985 SW 74 Court  
Miami, Florida 33155 USA  
Tel: 305 667 5167  
Fax: 305 663 0964  
Beta@radiocarbon.com  
www.radiocarbon.com

**Darden Hood**  
President

**Ronald Hatfield**  
**Christopher Patrick**  
Deputy Directors

May 24, 2010

Mr. Andres Rivera  
Arturo Prat 514  
Valdivia, Chile

RE: Radiocarbon Dating Results For Samples CECS-001, CECS-002

Dear Mr. Rivera:

Enclosed are the radiocarbon dating results for two samples recently sent to us. They each provided plenty of carbon for accurate measurements and all the analyses proceeded normally. The report sheet contains the dating result, method used, material type, applied pretreatment and two-sigma calendar calibration result (where applicable) for each sample.

This report has been both mailed and sent electronically, along with a separate publication quality calendar calibration page. This is useful for incorporating directly into your reports. It is also digitally available in Windows metafile (.wmf) format upon request. Calibrations are calculated using the newest (2004) calibration database. References are quoted on the bottom of each calibration page. Multiple probability ranges may appear in some cases, due to short-term variations in the atmospheric <sup>14</sup>C contents at certain time periods. Examining the calibration graphs will help you understand this phenomenon. Calibrations may not be included with all analyses. The upper limit is about 20,000 years, the lower limit is about 250 years and some material types are not suitable for calibration (e.g. water).

We analyzed these samples on a sole priority basis. No students or intern researchers who would necessarily be distracted with other obligations and priorities were used in the analyses. We analyzed them with the combined attention of our entire professional staff.

Information pages are enclosed with the mailed copy of this report. They should answer most of questions you may have. If they do not, or if you have specific questions about the analyses, please do not hesitate to contact us. Someone is always available to answer your questions.

The cost of the analysis was charged to the VISA card provided. As always, if you have any questions or would like to discuss the results, don't hesitate to contact me.

Sincerely,

  
Digital signature on file

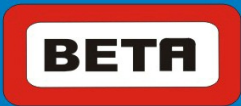

# REPORT OF RADIOCARBON DATING ANALYSES

Mr. Andres Rivera

Report Date: 5/24/2010

Material Received: 5/6/2010

| Sample Data                                                                                                                                                                                                                                                                                                                         | Measured Radiocarbon Age | 13C/12C Ratio | Conventional Radiocarbon Age(*) |
|-------------------------------------------------------------------------------------------------------------------------------------------------------------------------------------------------------------------------------------------------------------------------------------------------------------------------------------|--------------------------|---------------|---------------------------------|
| Beta - 279215<br>SAMPLE : CECS-001<br>ANALYSIS : Radiometric-Standard delivery<br>MATERIAL/PRETREATMENT : (wood): acid/alkali/acid<br>2 SIGMA CALIBRATION : Cal AD 1410 to 1470 (Cal BP 540 to 480)                                                                                                                                 | 500 +/- 40 BP            | -27.5 o/oo    | 460 +/- 40 BP                   |
| Beta - 279216<br>SAMPLE : CECS-002<br>ANALYSIS : Radiometric-Standard delivery<br>MATERIAL/PRETREATMENT : (wood): acid/alkali/acid<br>2 SIGMA CALIBRATION : Cal AD 1520 to 1580 (Cal BP 430 to 370) AND Cal AD 1630 to 1680 (Cal BP 320 to 270)<br>Cal AD 1770 to 1800 (Cal BP 180 to 150) AND Cal AD 1940 to 1950 (Cal BP 10 to 0) | 260 +/- 40 BP            | -25.6 o/oo    | 250 +/- 40 BP                   |

Dates are reported as RCYBP (radiocarbon years before present, "present" = AD 1950). By international convention, the modern reference standard was 95% the 14C activity of the National Institute of Standards and Technology (NIST) Oxalic Acid (SRM 4990C) and calculated using the Libby 14C half-life (5568 years). Quoted errors represent 1 relative standard deviation statistics (68% probability) counting errors based on the combined measurements of the sample, background, and modern reference standards. Measured 13C/12C ratios (delta 13C) were calculated relative to the PDB-1 standard.

The Conventional Radiocarbon Age represents the Measured Radiocarbon Age corrected for isotopic fractionation, calculated using the delta 13C. On rare occasion where the Conventional Radiocarbon Age was calculated using an assumed delta 13C, the ratio and the Conventional Radiocarbon Age will be followed by "\*\*". The Conventional Radiocarbon Age is not calendar calibrated. When available, the Calendar Calibrated result is calculated from the Conventional Radiocarbon Age and is listed as the "Two Sigma Calibrated Result" for each sample.

# CALIBRATION OF RADIOCARBON AGE TO CALENDAR YEARS

(Variables: C13/C12=-27.5:lab. mult=1)

Laboratory number: **Beta-279215**

Conventional radiocarbon age: **460±40 BP**

**2 Sigma calibrated result: Cal AD 1410 to 1470 (Cal BP 540 to 480)**  
(95% probability)

Intercept data

Intercept of radiocarbon age  
with calibration curve: Cal AD 1440 (Cal BP 510)

**1 Sigma calibrated result: Cal AD 1430 to 1450 (Cal BP 520 to 500)**  
(68% probability)

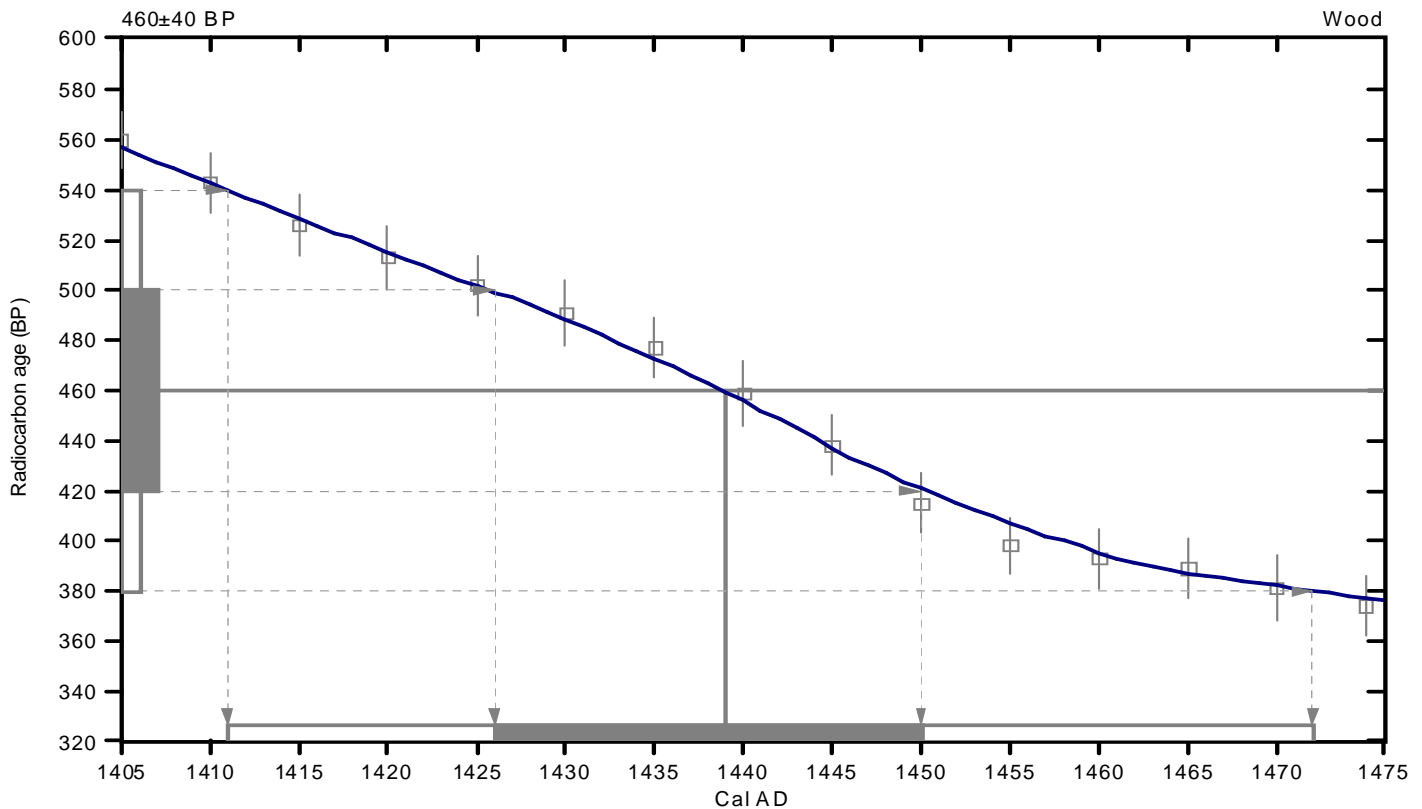

## References:

### Database used

*INTCAL04*

### Calibration Database

*INTCAL04 Radiocarbon Age Calibration*

*IntCal04: Calibration Issue of Radiocarbon (Volume 46, nr 3, 2004).*

### Mathematics

*A Simplified Approach to Calibrating C14 Dates*

*Talma, A. S., Vogel, J. C., 1993, Radiocarbon 35(2), p317-322*

## Beta Analytic Radiocarbon Dating Laboratory

4985 S.W. 74th Court, Miami, Florida 33155 • Tel: (305)667-5167 • Fax: (305)663-0964 • E-Mail: beta@radiocarbon.com

# CALIBRATION OF RADIOCARBON AGE TO CALENDAR YEARS

(Variables: C13/C12=-25.6:lab. mult=1)

**Laboratory number: Beta-279216**

**Conventional radiocarbon age: 250±40 BP**

**2 Sigma calibrated results: Cal AD 1520 to 1580 (Cal BP 430 to 370) and  
(95% probability) Cal AD 1630 to 1680 (Cal BP 320 to 270) and  
Cal AD 1770 to 1800 (Cal BP 180 to 150) and  
Cal AD 1940 to 1950 (Cal BP 10 to 0)**

Intercept data

Intercept of radiocarbon age  
with calibration curve: Cal AD 1650 (Cal BP 300)

1 Sigma calibrated result: Cal AD 1640 to 1660 (Cal BP 310 to 280)  
(68% probability)

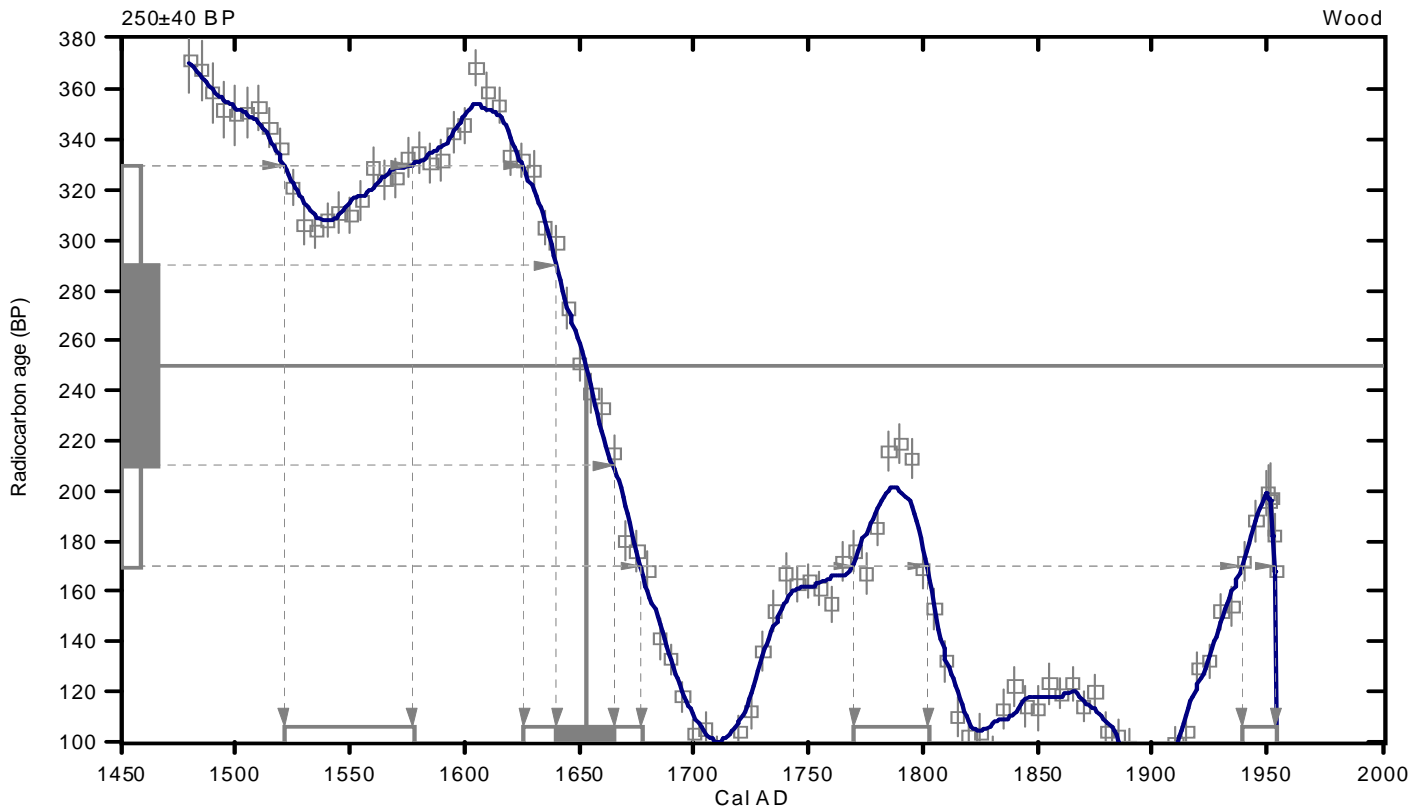

## References:

### Database used

INTCAL04

### Calibration Database

INTCAL04 Radiocarbon Age Calibration

IntCal04: Calibration Issue of Radiocarbon (Volume 46, nr 3, 2004).

### Mathematics

A Simplified Approach to Calibrating C14 Dates

Talma, A. S., Vogel, J. C., 1993, Radiocarbon 35(2), p317-322

## Beta Analytic Radiocarbon Dating Laboratory

4985 S.W. 74th Court, Miami, Florida 33155 • Tel: (305)667-5167 • Fax: (305)663-0964 • E-Mail: beta@radiocarbon.com
